# Supplementary material for: Domestication Process of the Goat Revealed by an Analysis of the Nearly Complete Mitochondrial Protein-Encoding Genes
Source: PLoS One. 2013 Aug 1;8(8):e67775. doi: 10.1371/journal.pone.0067775 (PMC3731342; doi:10.1371/journal.pone.0067775)
Supplement: Table S2 — PCR primer pairs used for amplification of mitochondrial protein coding region and HV1 region. (XLS) [file pone.0067775.s005.xls]

## Sheet: TableXX
Table XX	mtDNA haprogroups of 36 goats sequenced protein-coding regions
		Sample
Haplogroup	Population	Size		Individual number
				(Accession number)
A	Japanese Saanen	2		G1226, G1228
				()
	Korean native	1		Y125
				()
	Mongolian native	6		G699, G711, G716, G721, G749, G796
				()
	Indonesian Etawa	1		G1307
				()
	Bangladeshi Black Bengal	6		G1223, G1225, G1335, G1341, G1342, G1343
				()
	Bezoar	1		G1239
				()
B	Indonesian Etawa	4		G1305, G1323, G1324, G1332
				()
	Indonesian Kambing Katjang	5		G631, G645, G660, G664, G682
				()
	Philippine native	3		G1380, G1397, G1451
				()
	Bangladeshi Black Bengal	3		G1224, G1334, GA610
				()
C	Mongolian native	2		G866, G872
				()
D	Mongolian native	2		G725, G854
				()

## Sheet: TableYY
Table 2 PCR primer pairs used for amplification of mitochondrial protein coding region and HV1 region
Target region*		Forward primer			Reverse primer
		name	sequence ( 5'→3')		name	sequence ( 5'→3')
ND1		ND1-L3023	AGT TAA GGT GGC AGA GCC G		ND1-H4226	CCA ACA TTT TGG GGG TAT GC
ND2		ND2-LI4039	CAT CCC ACC ACA AAC ATA AGA A		ND2-HI5650	GCA AAG CAT TAG ACT GTA AAT C
CO1		CO1-1L	ACC ACC CTA TCA CTA TCA CTC		CO1-1H	TGT GTT TAG GTT TCG GTC TGT
CO1		CO1-2L	CCC CCT CTT TCC TAT TAC TT		CO1-2H	ATG GGT GAT GTT GCG TCT TG
CO2－ATP8		CO2-L6786	AGA CCT AAC CAC AAC AAA TC		CO2-H8059	CAT TGT TGG AGA GAG ACG AG
ATP6		ATPase6-L7865	ACA CAA CTT CTA CCA CAA CC		ATPase6-H8782	ATC ACA TCT CGT CAT CAC TG
CO3－ND3		CO3L	CTA ACA AGC ATC AGT CCT ACA ACA		CO3H	ATG CTG GCT AAG GTG AAG TGT G
ND3－ND4L		ND34L	CTG CCT GAT ACT GAC ACT TT		ND34H	GAC GTC TGT TTG GTT TCC T
ND4		ND4L	TCT TCT CCG ACT CCC TAT CT		ND4H	AGT GGG TAG TTG GTG GAT TT
ND4-ND5		ND5-1L	GCC CTA TAC TCC CTC TAC A		ND5-1H	AGG AGT GCG AAG AAG ATA A
ND5－ND6		ND5-2L	CTT GCA CTA ACA GGA ATA C		ND5-2H	CAG CCA TAA TTT ACA TCT C
Cｙｔｂ		Cytb-L	ATA GGC GAA GGT TTT GAA GA		Cytb-H	GCT TTG GGT GCT GAT AGT GA
D-loop HV1		D-HVI-CAP-FI	TCC ATA TAA CGC GGA CAT AC		D-HVI-CAP-RI	ATG GCC CTG AAG AAA GAA C
		* ND1: NADH dehydrogenase subunit 1, ND2: NADH dehydrogenase subunit 2, CO1: cytochrome oxidase subunit 1, CO2: cytochrome oxidase subunit 2, ATP8: ATPase subunit 8, ATP6: ATPase subunit 6, CO3: cytochrome oxidase subunit 3, ND3: NADH dehydrogenase subunit 3, ND4L: NADH dehydrogenase subunit 4 light-chain, ND4: NADH dehydrogenase subunit 4, ND5: NADH dehydrogenase subunit 5, ND6: NADH dehydrogena…
