# Supplementary material for: Domestication Process of the Goat Revealed by an Analysis of the Nearly Complete Mitochondrial Protein-Encoding Genes
Source: PLoS One. 2013 Aug 1;8(8):e67775. doi: 10.1371/journal.pone.0067775 (PMC3731342; doi:10.1371/journal.pone.0067775)
Supplement: Table S3 — List of the variant sites. (XLSX) [file pone.0067775.s006.xlsx]

## Sheet: Sheet1
Supplemental Table S3 List of the variant sites
Haplogroup	sample ID	accession numbers	ATP6															ATP8					COX1																							COX2
A	G749	AB735757	G	T	G	A	T	T	A	G	G	C	A	G	C	T	G	C	C	T	T	A	G	C	T	T	T	A	C	C	A	T	T	T	C	C	C	C	T	C	C	C	T	T	G	A	T	T	C
	G796	AB735758	.	.	A	.	.	.	.	.	.	.	.	.	.	.	.	.	.	.	.	.	.	.	.	.	.	.	.	.	.	.	.	.	.	.	.	.	.	.	.	.	.	.	.	.	.	.	.
	G699	AB735771	.	.	A	.	.	.	.	.	.	.	.	.	.	.	.	.	.	.	.	.	.	.	.	.	.	.	.	.	.	.	.	.	.	.	.	.	.	.	.	.	.	.	.	.	.	.	.
	G711	AB735755	.	.	A	.	.	C	.	.	.	.	.	.	.	.	.	.	.	.	C	.	.	.	.	.	.	.	.	T	.	.	.	.	.	T	.	.	.	.	.	.	.	.	.	.	.	.	.
	G1223	AB735772	.	.	A	.	.	.	.	.	.	.	.	.	.	.	.	.	.	.	C	.	.	.	.	.	.	.	.	.	.	.	.	.	.	.	.	.	.	.	.	.	.	.	.	.	.	.	.
	G1225	AB735773	.	.	A	.	.	.	.	.	.	T	.	.	.	.	.	.	.	.	C	.	.	.	.	.	.	.	.	.	.	.	.	.	.	.	.	.	.	.	.	.	.	.	.	.	.	.	.
	G1335	AB735776	.	.	A	.	.	.	.	.	.	.	.	.	.	.	.	.	.	.	C	.	.	T	.	C	.	.	.	.	.	C	.	.	.	.	.	.	.	.	.	.	.	.	.	.	.	.	.
	G1341	AB735777	.	.	A	.	.	.	.	.	.	.	.	.	.	.	.	.	.	.	C	.	.	.	.	.	.	.	.	.	.	.	.	.	.	.	.	.	.	.	.	.	.	.	A	.	.	.	.
	G1342	AB735778	.	.	A	.	.	.	.	.	.	.	.	.	.	.	.	.	.	.	C	.	.	.	.	.	.	.	.	.	.	.	.	.	.	.	.	.	.	.	.	.	G	C	.	.	.	.	.
	G1343	AB735779	.	.	A	.	.	.	.	.	.	.	.	.	.	.	.	.	.	.	C	.	.	.	.	.	.	.	.	.	.	.	.	.	.	.	.	.	.	.	.	.	.	.	.	.	.	.	.
	Y125	AB735770	.	.	A	.	.	.	.	.	.	.	.	.	.	.	.	.	.	.	.	.	.	.	.	.	.	.	.	.	.	.	.	.	.	.	.	.	.	.	.	.	.	.	.	.	.	.	.
	G1226	AB735768	.	.	A	.	.	.	.	.	.	.	.	.	.	.	.	.	.	.	C	.	.	.	.	.	.	.	.	.	.	.	.	.	.	.	.	.	.	.	.	.	.	.	.	.	.	.	.
	G1228	AB735769	.	.	A	.	.	.	.	.	.	.	.	.	.	.	.	.	T	.	C	.	A	.	.	.	.	.	.	.	.	.	.	.	.	.	.	.	.	.	.	.	.	.	.	.	.	.	.
	G1239	AB736120-31	.	.	A	.	.	.	.	.	.	.	.	.	.	.	.	-	-	-	-	-	.	.	.	.	.	.	.	.	.	.	C	.	.	.	.	.	.	.	.	.	.	.	.	.	.	.	.
	G716	AB735756	.	.	A	.	.	.	.	.	.	.	.	.	.	.	.	.	.	.	C	.	.	.	.	.	.	.	.	.	.	.	.	.	.	.	.	.	.	.	.	.	.	.	.	.	.	.	.
	G1307	AB735781	.	.	A	.	.	.	.	A	.	.	.	.	.	.	.	.	.	.	C	.	-	-	-	-	-	-	-	-	-	-	-	-	-	-	-	-	-	-	-	-	-	-	-	.	.	.	.
	G778	AB735775	.	.	A	.	.	.	.	.	.	.	.	.	.	.	.	.	.	.	C	.	-	-	-	-	-	-	-	-	-	-	-	-	-	-	-	-	-	-	-	-	-	-	-	.	.	.	.
	GU068049	GU068049	.	.	A	.	.	.	.	.	.	.	.	.	.	.	.	.	.	.	C	.	.	.	.	.	.	.	.	.	.	.	.	.	.	.	.	.	.	.	T	.	.	.	.	.	.	.	.
B	G1305	AB735760	A	C	A	.	.	.	.	.	.	.	.	.	T	.	.	T	.	C	C	.	.	.	C	.	.	.	.	.	.	.	.	.	T	.	.	.	.	.	.	.	.	.	.	G	.	.	.
	G1323	AB735761	A	C	A	.	.	.	.	.	.	.	.	.	T	.	.	T	.	C	C	.	.	.	C	.	.	.	.	.	.	.	.	.	T	.	.	.	.	.	.	.	.	.	.	G	.	.	.
	G1324	AB735782	A	C	A	.	.	.	.	.	.	.	.	.	T	.	.	T	.	C	C	.	.	.	C	.	.	.	.	.	.	.	.	.	T	.	.	.	.	.	.	.	.	.	.	G	.	.	.
	G631	AB735750	A	C	A	.	.	.	.	.	.	.	.	.	T	.	.	T	.	C	C	.	.	.	C	.	.	.	.	.	.	.	.	.	T	.	.	.	.	.	.	.	.	.	.	G	.	.	.
	G645	AB735749	A	C	A	.	.	.	.	.	.	.	.	.	T	.	.	T	.	C	C	.	.	.	C	.	.	.	.	.	.	.	.	.	T	.	.	.	.	.	.	.	.	.	.	G	.	.	.
	G660	AB735751	A	C	A	.	.	.	.	.	.	.	.	.	T	.	.	T	.	C	C	.	.	.	C	.	.	.	.	.	.	.	.	.	T	.	.	.	.	.	.	.	.	.	.	G	.	.	.
	G664	AB735752	A	C	A	.	.	.	.	.	.	.	.	.	T	.	.	T	.	C	C	.	.	.	C	.	.	.	.	.	.	.	.	.	T	.	.	.	.	.	.	.	.	.	.	G	.	.	.
	G665	AB735753	A	C	A	.	.	.	.	.	.	.	.	.	T	.	.	T	.	C	C	.	.	.	C	.	.	.	.	.	.	.	.	.	T	.	.	.	.	.	.	.	.	.	.	G	.	.	.
	G682	AB735754	A	C	A	.	.	.	.	.	.	.	.	.	T	.	.	T	.	C	C	.	.	.	C	.	.	.	.	.	.	.	.	.	T	.	.	.	.	.	.	.	.	.	.	G	.	.	.
	G1397	AB735765	A	C	A	.	.	.	.	.	.	.	.	.	T	.	.	-	-	-	-	-	.	.	C	.	.	.	.	.	.	.	.	.	T	.	.	.	.	.	.	.	.	.	.	G	.	.	.
	G1451	AB735766	A	C	A	.	.	.	.	.	.	.	.	.	T	.	A	-	-	-	-	-	.	.	C	.	.	.	.	.	.	.	.	.	T	.	.	.	.	.	.	.	.	.	.	G	.	.	.
	G609	AB736085-95	A	C	A	.	.	.	.	.	A	.	.	.	T	.	.	T	.	C	C	.	.	.	C	.	.	.	.	.	.	.	.	.	T	.	.	.	.	.	.	.	.	.	.	G	.	.	.
	G1224	AB735763	A	C	A	.	.	.	.	.	.	.	.	.	T	.	.	T	.	C	C	.	.	.	C	.	.	.	.	.	.	.	.	.	T	.	.	.	.	.	.	.	.	.	.	G	.	.	.
	GA610	AB736096-106	A	C	A	.	.	.	.	.	.	.	.	.	T	.	.	T	.	C	C	.	.	.	C	.	.	.	.	.	T	.	.	.	T	.	.	.	.	.	.	.	-	-	-	G	.	.	.
	G1332	AB735762	A	C	A	.	.	.	.	.	.	.	.	.	T	.	.	T	.	C	C	.	-	-	-	-	-	-	-	-	-	-	-	-	-	-	-	-	-	-	-	-	-	-	-	G	.	.	.
	GU295658	GU295658	A	C	A	.	.	.	.	.	.	.	.	.	T	.	.	T	.	C	C	.	.	.	C	.	.	.	.	.	.	.	.	.	T	.	.	.	.	.	.	.	.	.	.	G	.	.	.
C	G866	AB735767	A	C	A	G	C	.	C	.	.	.	.	.	.	C	.	T	.	.	C	.	.	.	C	.	.	G	T	.	.	.	.	C	.	.	T	.	C	T	.	T	.	.	.	.	.	.	T
	G872	AB735759	A	C	A	G	C	.	C	.	.	.	.	.	.	C	.	T	.	.	C	.	.	.	C	.	.	G	T	.	.	.	.	C	.	.	T	.	C	T	.	T	.	.	.	.	.	.	T
D	G725	AB735780	A	.	A	.	.	.	.	.	.	.	G	.	.	.	.	T	.	.	C	.	.	.	.	.	C	.	.	.	.	.	.	.	.	.	.	G	.	.	.	.	.	.	.	.	C	C	.
	G751	AB736107-19	A	.	A	.	.	.	.	.	.	.	G	A	.	.	.	T	.	.	C	.	.	.	.	.	.	.	.	.	.	.	.	.	.	.	.	G	.	.	.	.	.	.	.	.	C	C	.
	G854	AB735774	A	.	A	.	.	.	.	.	.	.	G	.	.	.	.	T	.	.	C	G	.	.	.	.	.	.	.	.	.	.	.	.	.	.	.	G	.	.	.	.	.	.	.	.	C	C	.
Identical sequences with G749 were shown as dot symbol.
Fixed sites in each haplogroups were colored in yellow.
Gap sites were colored in gray.
[truncated: 154 more columns]
